# Supplementary material
Source: PubMed Central journal article supplement (PMC5997382)
Supplement: ac8b00850_si_001.pdf [file ac8b00850_si_001.pdf]

# Supporting Information to

## Open-Source Potentiostat for Wireless Electrochemical Detection with Smartphones

Alar Ainla,<sup>1,2,‡</sup> Maral P. S. Mousavi,<sup>1,‡</sup> Maria-Nefeli Tsaloglou,<sup>1,3</sup> Julia Redston,<sup>1</sup> Jeffrey G. Bell,<sup>1</sup> M. Teresa Fernández-Abedul,<sup>3</sup> and George M. Whitesides<sup>1,4,5,\*</sup>

<sup>1</sup>Department of Chemistry and Chemical Biology, Harvard University, Cambridge, Massachusetts 02138, United States.

<sup>2</sup>International Iberian Nanotechnology Laboratory (INL), Braga, 4715-330, Portugal.

<sup>2</sup>Diagnostics for All, Inc. (DFA), Salem, MA 01970, USA.

<sup>3</sup>Department of Physical and Analytical Chemistry, University of Oviedo, Oviedo, Spain.

<sup>4</sup>Wyss Institute for Biologically Inspired Engineering, Harvard University, Cambridge, Massachusetts 02138, United States.

<sup>5</sup>Kavli Institute for Bionano Science and Technology, Harvard University, Cambridge, Massachusetts 02138, United States.

‡Equal Contribution

\*Corresponding Author: [gwhitesides@gmwgroup.harvard.edu](mailto:gwhitesides@gmwgroup.harvard.edu), +1-617-495-9432

## Table of Content

|                                                                            |     |
|----------------------------------------------------------------------------|-----|
| 1. Comparison of UWED, UMED, and other open-source potentiostats.....      | S3  |
| 2. Acronyms.....                                                           | S4  |
| 3. Hardware Design.....                                                    | S4  |
| 4. Firmware.....                                                           | S13 |
| 5. Communication Protocol and Software.....                                | S15 |
| 6. Electrical Characterization.....                                        | S18 |
| 6.1. Potentiometric mode.....                                              | S18 |
| 6.2. Amperometric mode.....                                                | S19 |
| 6.3. Power consumption and battery.....                                    | S22 |
| 7. Comparison between performance of UWED and commercial potentiostat..... | S22 |
| 7.1. Potentiometry.....                                                    | S25 |
| 7.2. Chronoamperometry.....                                                | S30 |
| 7.3. Cyclic voltammetry.....                                               | S32 |
| 7.4. Square wave voltammetry.....                                          | S33 |
| 8. Additional Resources.....                                               | S35 |

# 1. Comparison of UWED, UMED, and other open-source potentiostats

Table S1. Comparison between this work and previously reported open-source portable potentiostats. NA represents not available.

|                               | UWED (this work)                                                     | UMED <sup>1</sup>                                                              | CheapStat <sup>2</sup>                                                | Dstat <sup>3</sup>                                                     | Potentiostat/Galvanostat <sup>4</sup>                                                                                                              |
|-------------------------------|----------------------------------------------------------------------|--------------------------------------------------------------------------------|-----------------------------------------------------------------------|------------------------------------------------------------------------|----------------------------------------------------------------------------------------------------------------------------------------------------|
| Features and Design           | Universal potentiostat Controlled with a smartphone                  | Universal potentiostat Built-in control                                        | Universal potentiostat Controlled with a computer                     | Universal potentiostat Controlled with a computer                      | Universal potentiostat Controlled with a computer                                                                                                  |
| Open source                   | Yes                                                                  | No                                                                             | Yes                                                                   | Yes                                                                    | Yes                                                                                                                                                |
| Connectivity to Computers     | Wireless connection via Bluetooth Low Energy                         | Wired connection via USB/serial port (for the transfer of final raw data only) | Wired connection via USB/serial port                                  | Wired connection via USB/serial port                                   | Wired connection via USB/serial port                                                                                                               |
| Connectivity to Mobile Phones | Wireless connection via Bluetooth Low Energy                         | Wired connection via Audio input (for the transfer of final raw data only)     | NA                                                                    | NA                                                                     | NA                                                                                                                                                 |
| Techniques                    | POT, CA, CV, DPV, SWV                                                | POT, CA, CV, DPV, SWV                                                          | CA, CV, SWV, ASV                                                      | POT, CA, CV, DPV, SWV                                                  | POT, CA, CV                                                                                                                                        |
| Hardware user interface       | No interface Controlled with an external device such as a smartphone | LCD display and three buttons                                                  | LCD display and joystick                                              | No interface Controlled with a computer                                | No interface Controlled with a computer                                                                                                            |
| Voltage Range                 | ±1.5 V (67 $\mu$ V resolution) 40 $\mu$ V noise                      | ±2.0 V (50 $\mu$ V resolution) 40 $\mu$ V noise                                | ±1.0 V Resolution and noise not reported                              | ±1.5 V (46 $\mu$ V resolution) Noise not reported                      | ±8 V (15.3 $\mu$ V resolution) Noise not reported                                                                                                  |
| Current Range                 | 1 range: ±180 $\mu$ A 6.4 nA resolution 30 nA noise + nonlinearity   | 1 range: ± 200 $\mu$ A 5 nA resolution, 0.5 nA noise                           | 2 ranges: ±100 nA and ±10 $\mu$ A.                                    | 7 ranges. Lowest limit of detection 600 fA.                            | 3 ranges: ±20 mA, ±200 $\mu$ A and ±2 $\mu$ A. Resolution: 12 nA, 120 pA and 1.2pA and noise: 88 nA, 1.1 nA and 9.9 pA respectively to the ranges. |
| Reported Cost of Components   | 60 USD/each Calculated for 1 unit                                    | 25 USD/each Calculated for 1000 units                                          | 80 USD/each Number of units for calculation of price was not reported | 120 CAD/each Number of units for calculation of price was not reported | 100 USD/each Calculated for 1 unit                                                                                                                 |
| Power source                  | Rechargeable Battery                                                 | Rechargeable Battery                                                           | 2 x AA batteries or USB                                               | USB                                                                    | USB                                                                                                                                                |

## 2. Acronyms

We list the definition of abbreviations and acronyms used in this work in Table S2.

Table S2. List of abbreviations and acronyms used in this work.

|     |                                 |      |                                             |
|-----|---------------------------------|------|---------------------------------------------|
| ABS | Acrylonitrile Butadiene Styrene | LED  | Light-Emitting Diode                        |
| ADC | Analog-to-Digital Converter     | LiPo | Lithium Polymer Battery                     |
| BLE | Bluetooth Low Energy            | PCB  | Printed Circuit Board                       |
| DAC | Digital-to-Analog Converter     | SoC  | System on Chip                              |
| DRC | Design Rule Check               | USB  | Universal Serial Bus                        |
| IC  | Integrated Circuit              | USD  | US Dollar                                   |
| LDO | Low-DropOut Regulator           | UWED | Universal Wireless Electrochemical Detector |

## 3. Hardware Design

Figure S1 shows the circuit diagram of Universal Wireless Electrochemical Detector (UWED).

We designed the circuit diagram and PCBs of UWED in the free educational version of PCB layout software, EAGLE 7.3.0 (CadSoft Computer GmbH).

We hand-soldered the components to the PCB board, using a fine soldering iron tip. We inspected the soldered PCB board with a microscope and a multimeter, to ensure there are no accidental short-circuits and false connectivities. We designed the UWED case in AutoCAD 2013 and fabricated it with ABS plastic, using a 3D printer (StrataSys Fortus 250mc).

Table S3 lists the components used in the design of UWED. The UWED uses the ADC built-in the BLE microcontroller. The IC8 in the PCB design (along with voltage divider resistors of R8 and R9, and capacitors of C14 and C15) is optional and is designated for an external ADC. The

PCB design also shows the logarithmic amplifier diodes of D1–D6 that can be added as optional components to change the gain of the amplifier and the current range of the UWED.

Since the goal of this work is presenting of a device that can be fabricated in a Do-It-Yourself type development, we have chosen electronic components that would allow easy manual soldering. The BLE microcontroller of RFDUINO has this characteristic: (i) its size and accessibility of its contact pads makes RFDUINO suitable for manual soldering. (ii) RFDUINO has integrated radiofrequency antenna. Design and soldering of antennas is more difficult because of the sensitivity of high-frequency electronics. (iii) RFDUINO is compatible with the Arduino programming environment and does not require advanced programming languages. Table S4 lists alternative options (that are smaller or less expensive than RFDUINO) that can be used as a BLE microcontroller in the circuitry of UWED.

The total cost of circuit components in UWED was 58 USD plus about 10 USD for the external LiPo charger. We had ordered the circuit components in the minimum number that distributors offered. The price of UWED can be decreased by 75% (15 USD) by ordering the components in larger quantities. Changing the scale of ordering the components would decrease the price per item and also make less expensive brands available for purchasing. Table S5 provides a list of options and prices of components for large scale ordering.

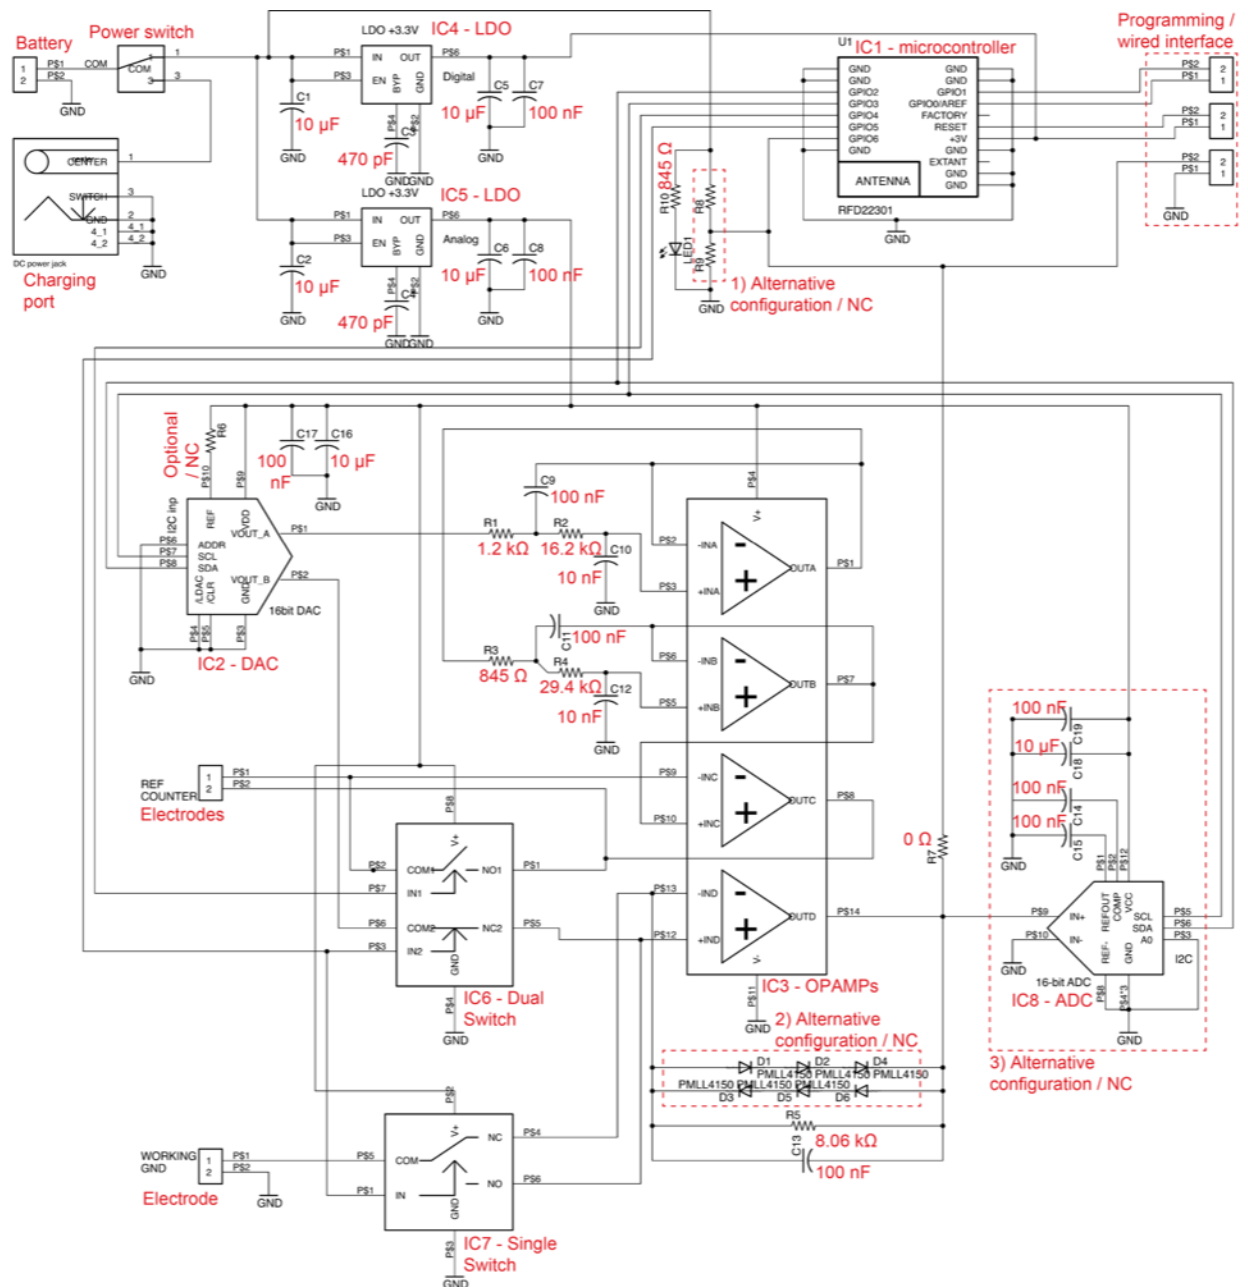

Figure S1. Circuit diagram of UWED. Table S3 lists the details of components. PADS identify the flat metallic areas on the PCB board that can be used for soldering external components to the PCB board. We used PADS to make wire connections to the PCB board. PADS1 shows the connection to the battery, PADS2 shows connections for firmware programming, PADS3 shows connections to reference and counter electrodes, and PADS4 shows connections for the working electrode and ground. The design includes three alternative configurations. The components of these alternative configurations are not connected (NC) in the final design of the UWED, but are discussed in Table S3.

Table S3. List of components used in the PCB of UWED. Part numbers are from Digi-Key unless specified otherwise. All costs are in USD for the minimal order volume on July 26<sup>th</sup>, 2017.

| Part                                      | Description                         | Model/Value                                           | Part number                                                           | Cost/Unit |
|-------------------------------------------|-------------------------------------|-------------------------------------------------------|-----------------------------------------------------------------------|-----------|
| IC1                                       | BLE microcontroller                 | RFDUINO, RFD22301                                     | 1562-1016-ND                                                          | 19.55     |
| IC2                                       | Dual DAC. 16-bit, I <sup>2</sup> C. | AD5667RBRMZ-2                                         | AD5667RBRMZ-2-ND                                                      | 11.04     |
| IC3                                       | 4x operational amplifiers           | AD8608ARUZ                                            | AD8608ARUZ-ND                                                         | 4.85      |
| IC4, IC5                                  | LDO 3.3V                            | MIC5205-3.3YM5-TR                                     | 576-1259-1-ND                                                         | 0.41      |
| IC6                                       | Dual switch                         | MAX4643EUA+                                           | MAX4643EUA+-ND                                                        | 1.46      |
| IC7                                       | Single switch                       | MAX4644EUT+T                                          | MAX4644EUT+TCT-ND                                                     | 2.89      |
| IC8*. <sup>a</sup>                        | 16-bit ADC, I <sup>2</sup> C        | LTC2471IMS#PBF                                        | LTC2471IMS#PBF-ND                                                     |           |
| R1                                        | Filter resistor                     | 1.2 k $\Omega$                                        | RR12P1.2KDCT-ND                                                       | 0.11      |
| R2                                        | Filter resistor                     | 16.2 k $\Omega$                                       | 311-16.2KCRCT-ND                                                      | 0.10      |
| R3                                        | Filter resistor                     | 845 $\Omega$                                          | 311-845CRCT-ND                                                        | 0.10      |
| R4                                        | Filter resistor                     | 29.4 k $\Omega$                                       | 311-29.4KCRCT-ND                                                      | 0.10      |
| R5                                        | WE amplifier gain resistor          | 8.06 k $\Omega$                                       | 311-8.06KCRCT-ND                                                      | 0.10      |
| R6*                                       |                                     | Optional                                              |                                                                       |           |
| R7 <sup>b</sup>                           | wire                                | $\approx 0 \Omega$                                    |                                                                       |           |
| R8, R9*. <sup>c</sup>                     | Battery meter resistor              | 100 k $\Omega$                                        |                                                                       |           |
| R10                                       | LED resistor                        | 845 $\Omega$                                          | 311-845CRCT-ND                                                        | 0.10      |
| C1,C2                                     | LDO input cap.                      | 10 $\mu$ F                                            | 478-9266-1-ND                                                         | 0.68      |
| C3,C4                                     | LDO cap.                            | 470 pF                                                | 1276-1300-1-ND                                                        | 0.10      |
| C5,C6                                     | LDO output cap.                     | 10 $\mu$ F                                            | 490-3340-1-ND                                                         | 0.15      |
| C7,C8                                     | LDO output cap.                     | 100 nF                                                | 478-1395-1-ND                                                         | 0.10      |
| C9,C11                                    | Filter cap.                         | 100 nF                                                | 478-1395-1-ND                                                         | 0.10      |
| C10,C12                                   | Filter cap.                         | 10 nF                                                 | 311-1136-1-ND                                                         | 0.10      |
| C13                                       | WE amplifier cap.                   | 100 nF                                                | 478-1395-1-ND                                                         | 0.10      |
| C14,C15*                                  | Ext ADC cap.                        | 100 nF                                                | 478-1395-1-ND                                                         | 0.10      |
| C16                                       | DAC power cap.                      | 10 $\mu$ F                                            | 490-3340-1-ND                                                         | 0.15      |
| C17                                       | DAC power cap.                      | 100 nF                                                | 478-1395-1-ND                                                         | 0.10      |
| C18*                                      | ADC power cap.                      | 10 $\mu$ F                                            | 490-3340-1-ND                                                         | 0.15      |
| C19*                                      | ADC power cap.                      | 100 nF                                                | 478-1395-1-ND                                                         | 0.10      |
| LED1                                      | Power indicator                     | LED (blue)                                            | VAOL-S8SB4CT-ND                                                       | 0.47      |
| D1-D6*. <sup>d</sup>                      | Logarithmic amplifier diodes        |                                                       |                                                                       |           |
| SWITCH                                    | Power switch                        |                                                       | GH7540CT-ND                                                           | 5.00      |
| DC JACK                                   | Charging connector                  | Jack 0.7x2.35mm                                       | CP-032HPJCT-ND                                                        | 1.05      |
| <b>Components not listed in Figure S1</b> |                                     |                                                       |                                                                       |           |
|                                           | Sensor socket                       | Female 6 pos                                          | A101966-ND                                                            | 1.91      |
|                                           | LiPo battery <sup>e</sup>           | 240 mAh x 3.7 V                                       | <a href="https://amzn.com/B00S02WEXW">https://amzn.com/B00S02WEXW</a> | 2.60      |
|                                           | PCB board <sup>f</sup>              | 2 Layer PCB, 0.062" FR4                               |                                                                       | 5.13      |
|                                           | USB LiPo charger <sup>g</sup>       | <a href="http://a.co/aMHgm3t">http://a.co/aMHgm3t</a> |                                                                       | 8.00      |
|                                           | Charging cable                      | CP-2196-ND                                            |                                                                       | 2.35      |

\* Optional components

<sup>a</sup> External ADC can be used instead of ADC built into the microcontroller.

<sup>b</sup> This connecting wire is needed if UWED is used with internal ADC and it is not place when with external one (IC8).

<sup>c</sup> These resistors are used as voltage dividers and allow measuring battery voltage; they are not placed if UWED is configured to use the ADC of the microcontroller.

<sup>d</sup> These diodes are placed instead of gain resistor R5, for the logarithmic current response.

<sup>e</sup> Ordered from Amazon as a pack of 5 (Total: 12.98 USD)

<sup>f</sup> PCB boards were ordered online at <http://www.custompcb.com/> from Silver Circuits Sdn. Bhd (Selangor, Malaysia) using PCB prototype service. Total 4 x 3 = 12 boards were obtained for 61.5 USD (minimum order).

<sup>g</sup> External charger ordered from Amazon.

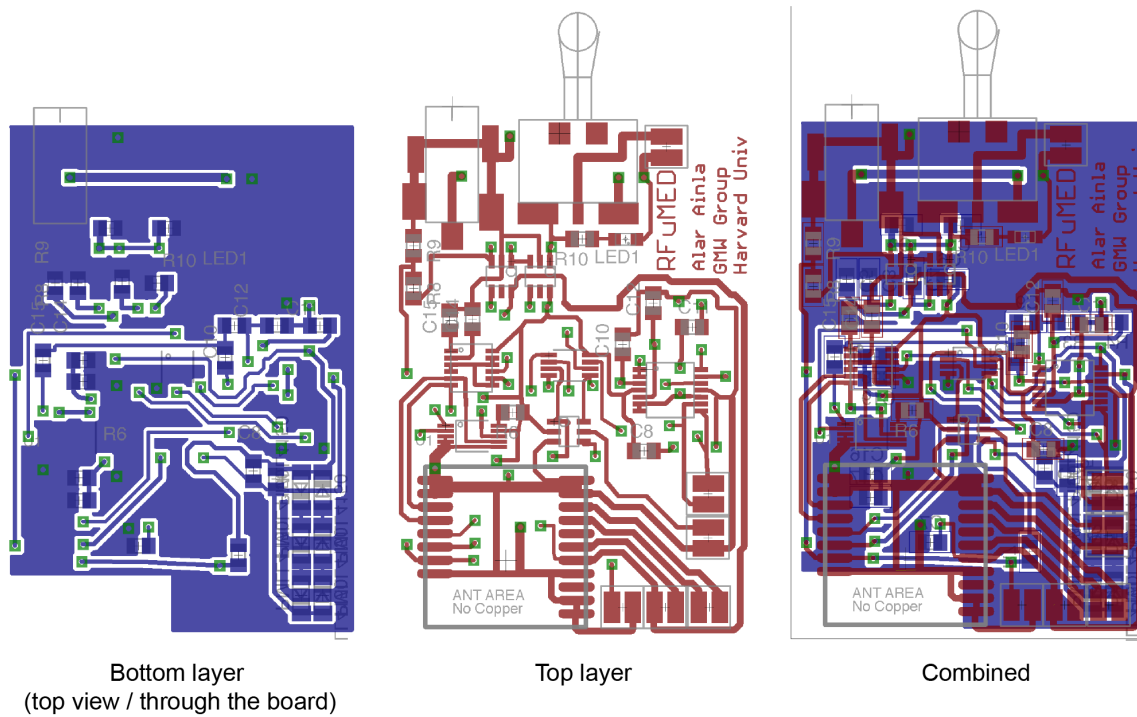

Figure S2. A schematic design of the PCB drawn with the free version of the Eagle program. The PCB source files in the Eagle format are provided as supporting materials. Prior to ordering the PCB, we validated the design with Silver Circuit’s design rule check (DRC).



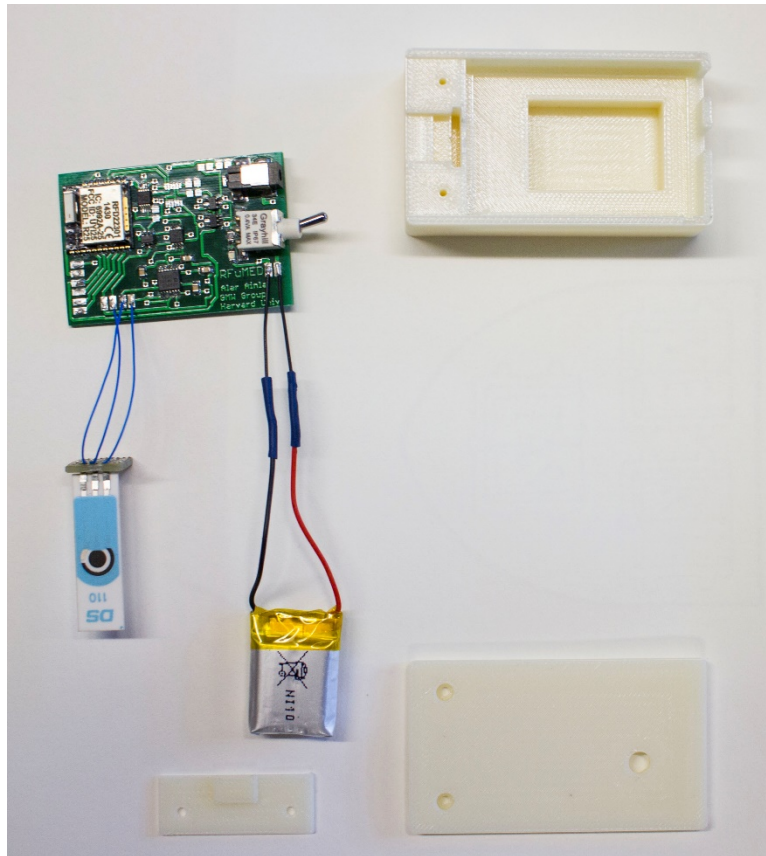

Figure S3. The components of UWED, circuit board, electrode connector, battery, and 3D-printed case, before the assembly.

Table S4. List of BLE microcontrollers that can be employed in the circuitry of UWED. We obtained the price estimations from DigiKey (MN, USA).

| Brand and the Product Code               | Processor         | Size               | Characteristics                                                                                                                                                                                                                                                                                                                                                                                                                                            | Cost/Unit (USD)    |
|------------------------------------------|-------------------|--------------------|------------------------------------------------------------------------------------------------------------------------------------------------------------------------------------------------------------------------------------------------------------------------------------------------------------------------------------------------------------------------------------------------------------------------------------------------------------|--------------------|
| RFDUINO™<br>(RFD22301)                   | ARM<br>Cortex M0  | 15 mm x 15<br>mm   | <ul style="list-style-type: none"> <li>▪ Easy to solder manually</li> <li>▪ Has integrated antenna</li> <li>▪ Is compatible with Arduino programming</li> </ul>                                                                                                                                                                                                                                                                                            | 15.57 <sup>a</sup> |
| Simblee™<br>(RFD77101)                   | ARM<br>Cortex M0  | 7 mm x 10 mm       | <ul style="list-style-type: none"> <li>▪ Has integrated antenna</li> <li>▪ Is compatible with Arduino programming</li> <li>▪ Has a compact design</li> <li>▪ Has a large number of IO ports and peripherals (30)</li> <li>▪ The case (45-pin LGA 0.5mm) is hard to solder manually</li> </ul>                                                                                                                                                              | 11.25 <sup>b</sup> |
| Rigado BMD-350 (Nordic nRF52832 BLE SoC) | ARM<br>Cortex M4F | 6.4 mm x 8.7<br>mm | <ul style="list-style-type: none"> <li>▪ Has integrated antenna</li> <li>▪ Has a compact design</li> <li>▪ Energy efficient and versatile (many peripherals and IO ports)</li> <li>▪ Has a large number of IO ports (32)</li> <li>▪ Is not compatible with Arduino programming and requires development of advanced software</li> <li>▪ Is hard to solder manually</li> </ul>                                                                              | 7.98 <sup>c</sup>  |
| NRF51822 (Nordic semiconductor BLE SoC)  | ARM<br>Cortex M0  | 3.8 mm x 3.8<br>mm | <ul style="list-style-type: none"> <li>▪ Is inexpensive</li> <li>▪ Has a large number of IO ports and peripherals (31)</li> <li>▪ Does not have integrated antenna, and requires incorporating high frequency RF antenna on the PCB design</li> <li>▪ Is not compatible with Arduino programming and requires development of advanced software</li> <li>▪ Is hard to solder manually</li> </ul>                                                            | 1.66 <sup>d</sup>  |
| Dialog semiconductor (DA14580)           | ARM<br>Cortex M0  | 2.5 mm x 2.5<br>mm | <ul style="list-style-type: none"> <li>▪ Is inexpensive</li> <li>▪ Has a large number of IO ports and peripherals (32)</li> <li>▪ Does not have integrated antenna, and requires and requires incorporating high frequency RF antenna on the PCB design</li> <li>▪ Is not compatible with Arduino programming and requires development of advanced software</li> <li>▪ Is hard to solder manually</li> <li>▪ Has a one-time-programmable memory</li> </ul> | 1.17 <sup>e</sup>  |

<sup>a</sup> price per piece for ordering 1 piece

<sup>b</sup> price per piece for ordering 5000 pieces

<sup>c</sup> price per piece for ordering 1000 pieces

<sup>d</sup> price per piece for ordering 5000 pieces

<sup>e</sup> price per piece for ordering 10000 pieces

Table S5. List of circuitry components for large scale ordering.

| Type                | Product Details                                                    | Characteristics                                                                                                                                                      | # of Units per purchase | Cost per Unit (USD) |
|---------------------|--------------------------------------------------------------------|----------------------------------------------------------------------------------------------------------------------------------------------------------------------|-------------------------|---------------------|
| DAC                 | DAC8571IDGKR (16-bit, I2C)                                         | <ul style="list-style-type: none"> <li>As working electrode DAC value is normally fixed, actually only single channel DAC would be sufficient.</li> </ul>            | 2,500                   | 2.81                |
| Op amp              | LM324DR2G                                                          | <ul style="list-style-type: none"> <li>Is inexpensive</li> </ul>                                                                                                     | 2,500                   | 0.082               |
| Op amp              | LMV324IDT                                                          | <ul style="list-style-type: none"> <li>Has low input impedance (&lt;100 MΩ)</li> </ul>                                                                               | 2,500                   | 0.155               |
| Op amp              | LMC6036IMX                                                         | <ul style="list-style-type: none"> <li>Has high input impedance (10 TΩ)</li> </ul>                                                                                   | 2,500                   | 1.129               |
| Manual power switch | PCB mounted slide switch (JS202011SCQN)                            |                                                                                                                                                                      | 1000                    | 0.267               |
| PCB                 | 2-layer 0.062" FR4 substrate, quantity of 20000 inch <sup>2</sup>  |                                                                                                                                                                      | NA                      | 0.31 <sup>a</sup>   |
| Battery             | Lithium polymer battery 5 mAh for Bluetooth devices                | <ul style="list-style-type: none"> <li>Battery lasts a short time (~1 h)</li> <li>Compact (0.6 x 15 x 18 mm<sup>3</sup>)</li> </ul>                                  | 3,000                   | 2.00                |
| Battery             | Small ultra thin 3.7 V 10 mAh rechargeable lithium polymer battery | <ul style="list-style-type: none"> <li>Battery lasts a short time (2 h)</li> <li>Compact (2 x 8 x 15 mm<sup>3</sup>) and low cost</li> </ul>                         | 1,000                   | 1-2                 |
| Battery             | 3.7 V 50 mAh Li-Ion lithium ion battery                            | <ul style="list-style-type: none"> <li>Battery lasts a long time (10 h)</li> <li>Compact (3 x 13 x 20 mm<sup>3</sup>) and low cost</li> <li>High power</li> </ul>    | 100                     | 1-2                 |
| Battery             | 3.7 V 140mAh rechargeable lithium polymer battery                  | <ul style="list-style-type: none"> <li>Battery lasts very long time (70 h)</li> <li>Compact (3 x 25 x 25 mm<sup>3</sup>) and low cost</li> <li>High power</li> </ul> | NA                      | 0.5                 |

<sup>a</sup> at a manufacturing (Silver Circuits) rate of 0.11 USD/inch<sup>2</sup>, for a 3.4 cm x 5.1 cm PCB  
 NA shows not mentioned or identified

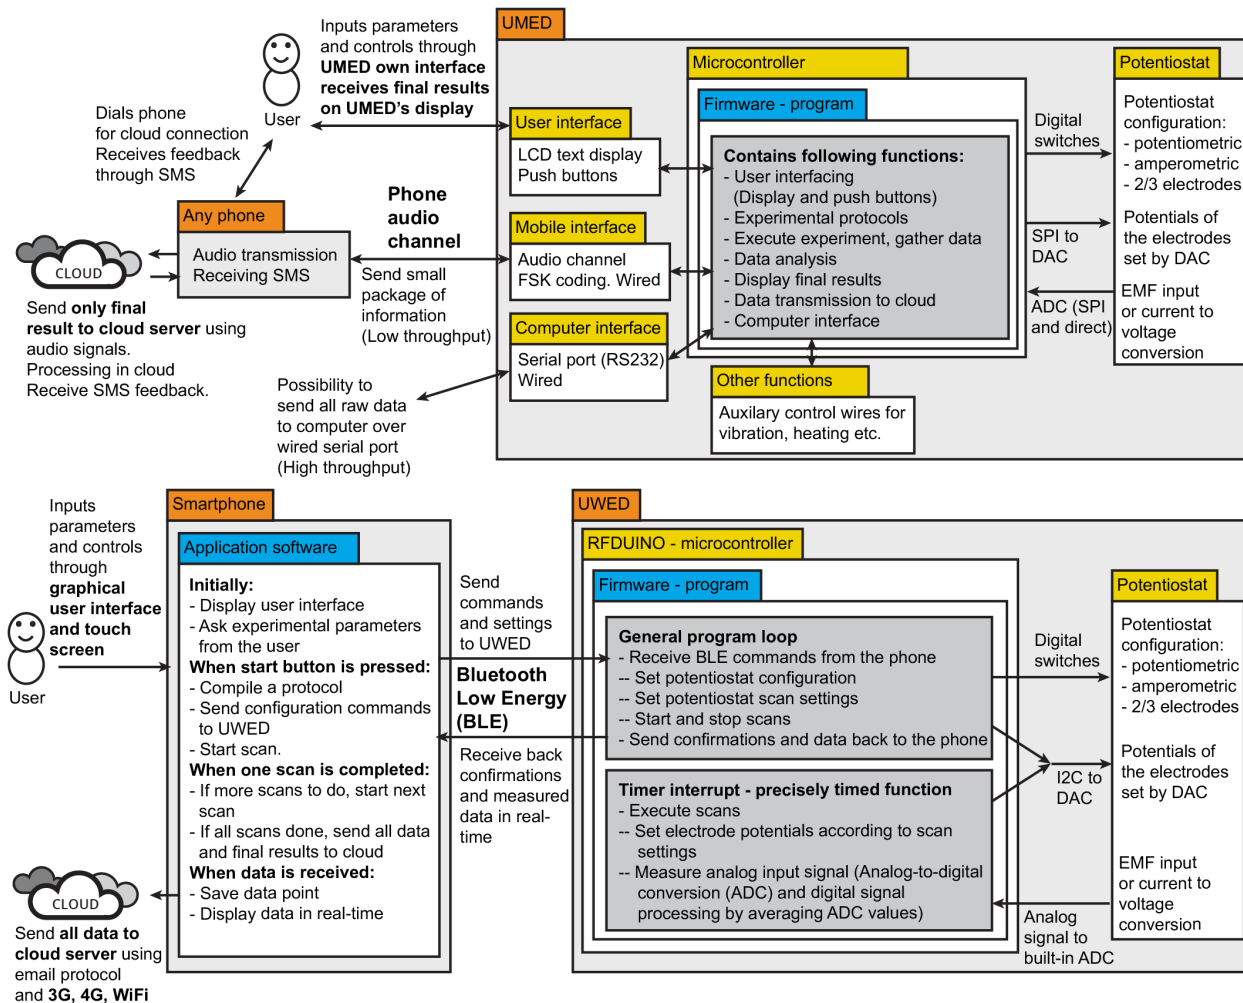

Figure S4. Block diagram of components of UMED and UWED and summary of function of their components.

## 4. Firmware

To run a potential scan, scan is defined in a sequence of well timed ( $\Delta t$ ) steps ( $N$ ) in which the voltage can be adjusted in increments ( $\Delta V$ ) and response current ( $I$ ) is measured and transmitted.

We have implemented possibility for different increments in case of odd ( $\Delta V_o$ ) and even ( $\Delta V_e$ ) steps. This design allows creating electrochemical techniques, such as: i) chronoamperometry (CA), where  $\Delta V_o = \Delta V_e = 0$ , current is measured at constant potential; ii) cyclic voltammetry (CV), where  $\Delta V_o = \Delta V_e = \Delta t \cdot v$  and  $v$  is scan rate; iii) square wave voltammetry (SWV), where  $\Delta V_e = -2A$  and  $\Delta V_o = 2 \cdot \Delta t \cdot v + 2A$ , and  $v$  is the scan rate and  $A$  is square wave amplitude.

Time ( $\Delta t$ ) can be also varied depending on odd or even steps for the purpose of differential pulse voltammetry (DPV). Other protocols can be constructed as a sequence of these individual scans.

It is possible to change the RFDUINO firmware for entirely different types of excitation signals.

Figure S5A illustrates the timing diagram of a single measurement step, which is composed of setting the electrode potential, integrating the input signal (longer integration lowers the noise), and communicating the results to the phone or tablet. The BLE requires certain amount of processor time to maintain the communication link with the phone. Each step is precisely timed by the microcontroller timer interrupt. Figure S5B shows diagrams of common electrochemical techniques, such as CA, CV, and SWV. Controller firmware has built-in routine to perform such scans, allowing to define the time-step ( $\Delta t$ ) and voltage increments, which can be zero (CA), same (CV) or different (SWV) for odd and even steps. Odd and even steps do not have direct electrochemical correspondence, rather they are a microprocessor friendly way to describe the electrochemical excitation signals, while values are calculated from electrochemical parameters as shown under every technique. (C) Multi-scan experiment, such as CV, can be constructed as a sequence of scans. For example one cycle of CV would be 2-3 individual scans. Each individual

scan is run by UWED, while switching from one scan to another is started by the program in the tablet, which makes it easy to design experiments composed of arbitrary sequences of different scans.

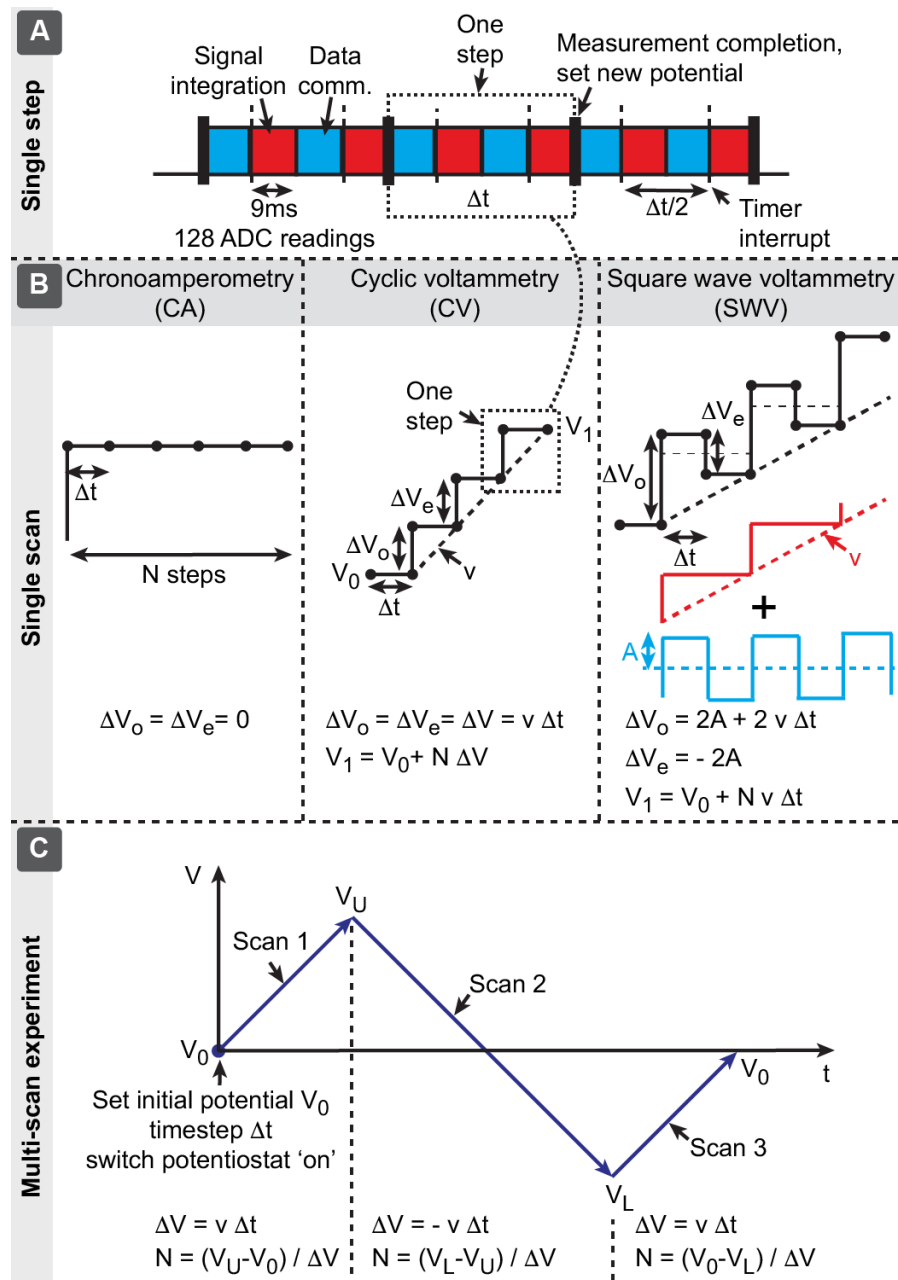

Figure S5. (A) Timing diagram of a single measurement step. (B) Construction of a scan and (C) a multi scan measurement, such as CV.

## 5. Communication Protocol and Software

UWED communicates with smartphones and tablets via Bluetooth Low Energy (BLE) and by sending and receiving commands in the string format (maximum 20 characters long). A universally unique identifier (UUID) labels the microcontroller for wireless communication. UUIDs are 128-bit numbers used to identify information in computer systems.

Device name is: **UWED**

Device UUID: **2220**

- read property UUID: **2221**

- write property UUID: **2222**

To begin the communications, the mobile phone or tablet sends the command “**X(number)**” to UWED, where “X” is the command code that denotes a single uppercase character in the range [A-Z], and the “number” represents a numerical value in long type (32-bit signed integer).

Once UWED receives the command, it responds back by sending the command “**Iysequence**” to the mobile phone or tablet. “I” is an index in the range of ‘0’ to ‘9’ that counts the number of messages sent by the UWED. “y” is the response code and is a single lowercase character in the range [a-z]. The “sequence” has maximum 18 characters. UWED responds to every command (sent by the smartphone) by acknowledging that the command was received; to do so, UWED sends the same small character and “:DONE” (i.e. k:DONE) back to the smartphone. Table S6 summarizes the input commands.

When UWED receives the command “**M(number)**”, it starts the electrochemical measurement and sends the measured values back to the smartphone in the data return format. Table S7 lists the data structure of the return.



Table S6. The description of the Input commands that UWED sends to the mobile phone or tablet over BLE.

| Char  | Parameter Range            | Function                                                | Description                                                                                                                                                                                             |
|-------|----------------------------|---------------------------------------------------------|---------------------------------------------------------------------------------------------------------------------------------------------------------------------------------------------------------|
| A     | 0–65536                    | Sets the reference potential                            | This function sets the offset in the DAC (16-bit) value in the potential of the reference electrode. The default value is 0.                                                                            |
| B     | 0–65536                    | Sets the potential of the working electrode             | This function sets the offset in the DAC (16-bit) value in the potential of the working electrode. The default value is 0.                                                                              |
| C     | 0 or 1                     | Sets the input mode                                     | Mode 0 is potentiometric (default). Potentiometric state also means that potentiostat is off and no current goes through the working electrode.<br>Mode 1 is amperometric.                              |
| D     | 2 or 3                     | Number of electrodes                                    | In the two-electrode configuration, the counter and reference electrodes are the same. Default is three electrodes.                                                                                     |
| E     | 15–1000                    | Sets the step of the base timer                         | The parameter is in ms, and one timestep in the measurement is 2x of the parameter value. Default is 25 ms, which makes the measurement timestep 50ms, and the device frequency 1/50 ms (20 Hz).        |
| F     | <i>none</i>                | Gets time for 100 cycles                                | This function measures the length of timesteps for 100 cycles. Value in ms.<br><i>f:value in ms</i>                                                                                                     |
| G     | Positive or negative value | Sets the scan increment of reference (odd step number)  | This function sets how many DAC units every odd step the reference channel value will increase (positive) or decrease (negative). Default is 0. This is 16-bit int. (+/- 30'000 units)                  |
| I     | Positive or negative value | Sets the scan increment of reference (even step number) | Same for even number. Default 0                                                                                                                                                                         |
| J     | Positive or negative value | Sets the scan increment of working (odd step number)    | Same for working electrode.                                                                                                                                                                             |
| K     | Positive or negative value | Sets the scan increment of working (even step number)   | Same for working electrode                                                                                                                                                                              |
| L     | 1...1000                   | Sets the number of steps                                | Total number of steps during the scan                                                                                                                                                                   |
| M     | <i>none</i>                | Runs sequence                                           | Start running the sequence<br>At every step of the run, UWED sends a message back to the smartphone in the following format: m:DONE (Once sequence is completed)                                        |
| N     | <i>none</i>                | Halts sequence                                          | holds the potential of the working, counter, and reference electrode at the values at the moment that the command was received                                                                          |
| O     | 0 or 15-1000               | Set alternative step length for the base timer          | This is similar to command 'E'. If value is 0 (default) all timer steps are equal in length. Alternative length is used only for DPV purposes, when odd ('E') and even ('O') timer steps are different. |
| P...Z |                            | RESERVED                                                | Enables adding new commands in case of updating the firmware                                                                                                                                            |

Table S7. Once UWED receives the command “M(number)” from the smartphone, it starts the scan. UWED sends the measured values in the data return format, back to the smartphone. Data return response is a 20-characters long and uses mixed text and binary encoding.

| Character | Description                                                                                  |
|-----------|----------------------------------------------------------------------------------------------|
| 1         | Message index. Ranges from ‘0’ to ‘9’ and increases each time                                |
| 2         | Identifier character ‘M’. Always the same                                                    |
| 3:4       | Odd step reference potential DAC value (16-bit unsigned int binary). Higher bits come first  |
| 5:6       | Odd step ADC signal reading (16-bit unsigned int binary). Higher bits come first             |
| 7:8       | Even step reference potential DAC value (16-bit unsigned int binary). Higher bits come first |
| 9:10      | Even step ADC signal reading (16-bit unsigned int binary). Higher bits come first            |
| 11:14     | Timestamp of even step in ms (32-bit unsigned long binary). Higher bits come first           |
| 15:16     | Even step working potential DAC value (16-bit unsigned int binary). Higher bits come first.  |
| 17:18     | Step index (16-bit unsigned int binary). Higher bits come first                              |
| 19:20     | 0. Reserved                                                                                  |

In the measuring mode (when command M is running), we do not expect to change the working potential during the run, but only the reference one, reason that working potential is not transmitted for each, but only even steps.

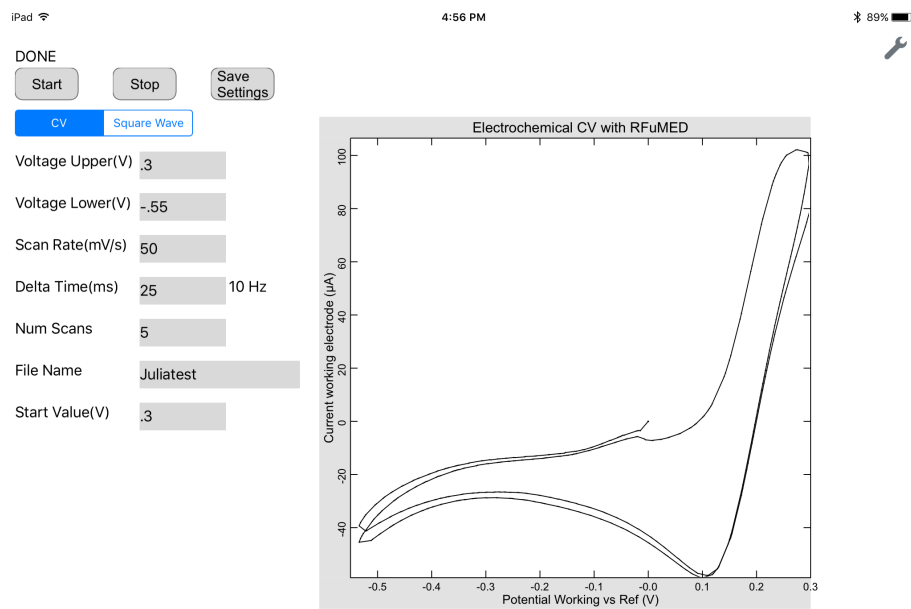

Figure S6. Example of graphical user interface (GUI) on tablet (iPad Mini).

## 6. Electrical Characterization of UWED

### 6.1 Potentiometric mode

In the potentiometric mode, we connect the reference and counter electrodes together and set the reference electrode DAC value to 22606 (potential about + 1.5 V).

The control of the working electrode potential is disconnected in the potentiometric mode.

Thereafter we adjusted the potential applied to the working electrode (relative to reference) using 100 k $\Omega$  potentiometer and 1.5 V AAA battery. We measured the voltage using digital multimeter Fluke 77IV and recorded the ADC value. We found the linear calibration of voltage and ADC value to be:  $V[\text{mV}] = 0.0503\text{ADC} - 1537.5$ . The digital resolution of one ADC unit is 50.3  $\mu\text{V}$ . We measured input noise level of 110  $\mu\text{V}$  at sampling rate 20 Hz.

## 6.2 Amperometric mode

Figures S7, S8, and S9 show the linearity and noise of UWED.

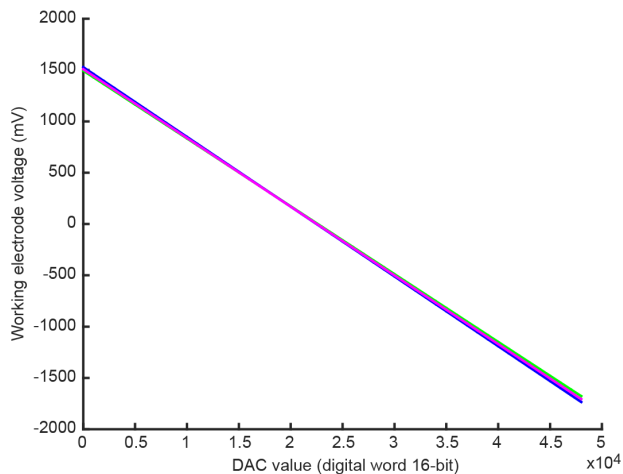

Figure S7. The calibration of electrode potential. We set the DAC value of the working electrode to 22500 (about 1.5 V), and scanned the DAC value of the reference electrode in the range of 0–48000. Values higher than 48000 will saturate the output. We measured the output voltage using Keithley 2410 Sourcemeter. UWED can cover a range of -1.5 V to +1.5 V potential difference between the working and reference electrodes. We fitted the data to a linear function ( $y=ax+b$ ), where  $a=-0.06700\pm 0.00096$  mV/digit and  $b=1510\pm 17$  mV (variations are comparison between 3 different devices). Maximum deviation from linearity was 1 mV and output noise about 0.5 mV. The zero point of ADC was  $22538\pm 66$ .

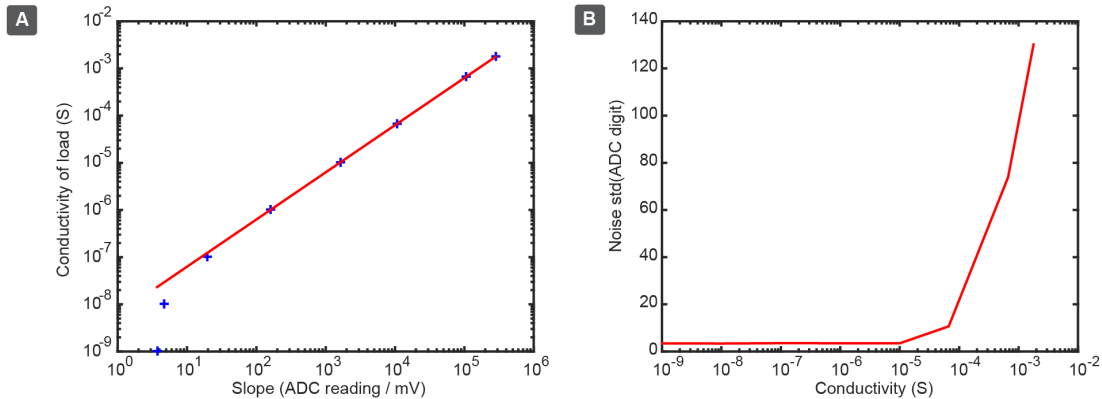

Figure S8. Measurement of current response. We measured the current in potential window of -1.5 V to +1.5 V with different resistive loads from  $560 \Omega$  to  $1 \text{ G}\Omega$ . (A) shows that an expected linear relationship between the resistance and voltage can be achieved over 4-orders of magnitude. (B) Noise amplitude was calculated as standard deviation from the linear value. This combines both random electronic noise and non-linearity. At low currents the electronic noise was in the range 5–15 digits. At high currents deviations due to non-linearity were 130–240 digits.  $I[\text{nA}] = A * (\text{ADCValue} + B)$ , where  $A = 6.313 \pm 0.026 \text{ nA/digit}$ ,  $B = -30290 \pm 300$  digits (standard deviation is for device-to-device variations of three units of UWED). For each particular device, we used their exact corresponding calibration coefficient. Typical noise  $< 30 \text{ nA}$ , maximum noise  $< 100 \text{ nA}$ , full range non-linearity  $< 1.5 \mu\text{A}$ , full current range  $\pm 180 \mu\text{A}$ .

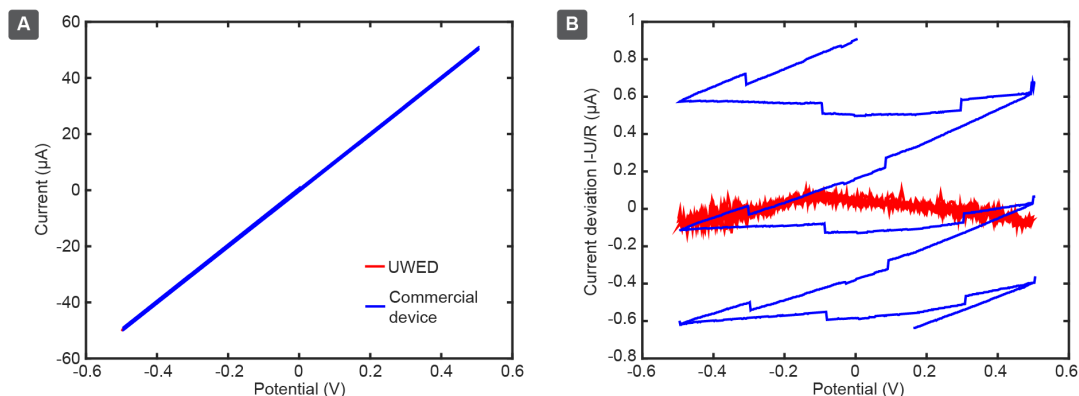

Figure S9. Comparison of UWED and a commercial device (AutoLAB). (A) Three full CV scans were recorded with AutoLAB Dummy Cell 2, where reference and counter electrodes were connected together and further connected to working electrode through a 10 k $\Omega$  resistor. We obtained linear slope as expected (Both red and blue lines overlap). Graph (B) shows deviations from linearity. Here, we inspected the same data as shown on panel (A), but subtracted  $U/R$  from current to observe deviations. We can see slight, about 0.2  $\mu\text{A}$ , nonlinearity and electronic noise in case of UWED, while the commercial potentiostat has substantially lower electronic noise. The commercial potentiostat shows small steps (<100 nA) in current values, which correspond to automatic changes of current range and some gradual drift between scans (total about 1.5  $\mu\text{A}$  over three scans). The exact origin of the drift in the case of the commercial device cannot be interpreted at this time.

### 6.3 Power consumption and battery

We measured the battery consumption using a digital multimeter Fluke 77IV. The current battery (240 mAh) should be sufficient for 45–60 h of measurements.

Table S8. Power and current consumption of UWED during different operations.

| Operation                                                                                                         | Measured average current (mA) |
|-------------------------------------------------------------------------------------------------------------------|-------------------------------|
| Standby, no communication                                                                                         | 4.0                           |
| Active measurement, data transmission, UWED does not supply current to the working electrode, potentiometric mode | 4.4                           |
| Active measurement, data transmission, UWED supplies current to the working electrode, amperometric mode          | 4.8                           |

## 7. Comparison between performance of UWED and commercial benchtop potentiostat

We used a commercial screen-printed three-electrode cell (DRP-110CNT-GNP, DropSens, Llanera, Spain) for performing the chronoamperometry (CA), square wave voltammetry (SWV), and cyclic voltammetry (CV) on ferricyanide. This electrode contains a carbon (modified with gold and carbon nanotubes) working electrode, carbon counter electrode, and silver reference electrode. We performed the CA, SWV, and CV experiments with UWED and the benchtop commercial potentiostat (AutoLAB, PGSTAT12, Metrohm), and compared the performance of the two. For each measurement, we placed 40  $\mu\text{L}$  of fresh solution of ferricyanide on the working zone of a screen-printed electrode. We prepared the solutions of potassium ferricyanide containing 1 mM  $\text{KH}_2\text{PO}_4$ , 56 mM  $\text{Na}_2\text{HPO}_4$ , 150 mM  $\text{NaCl}$ , pH 7.4, and 10  $\mu\text{M}$  to 10 mM ferricyanide. For the chronoamperometry experiments, we applied a potential of 100 mV to the working electrode (vs the reference electrode), and recorded the current (from 0.5 s to 5 s). We

measured the cyclic voltammograms of ferricyanide using concentrations from 10  $\mu\text{M}$  to 10 mM, at scan rates from 20 to 300 mV/s. We recorded the square wave voltammograms of ferricyanide at concentrations ranging from 10  $\mu\text{M}$ –10 mM. We scanned the potential of the working electrode from 0.4 to -0.2 V at a scan rate of 50 mV/s (5 mV steps), with an amplitude of 25 mV and frequency of 10 Hz.

We tested the potentiometric mode of UWED using in-house built  $\text{K}^+$  and  $\text{Na}^+$  ion-selective electrodes (ISEs). We fabricated the ISEs according to protocols established in the literature.<sup>5,6</sup> We used a double-junction free-flow Ag/AgCl reference electrode (Metler Doledo DX200) with an inner-filling solution of 3 M KCl and bridge electrolyte of 1 M lithium acetate. We measured the electrical potential of the ISEs in series of NaCl and KCl solutions with concentrations ranging over six orders of magnitude (100 mM–100 nM). We compared the potentials measured with the UWED and with a commercial precision electrochemical EMF interface (EMF 16, Lawson Labs Inc). We placed the ISEs in the  $\text{K}^+$  or  $\text{Na}^+$  solutions for 60 s, and collected the data over the last 30 s.

Table S9 compares the technical aspects and price of UWED and two commercial benchtop potentiostats that we used as standard equipment for evaluating the performance of UWED. We compare the performance (noise level, determined values, drifts) of UWED with a benchtop commercial potentiostat (Autolab, PGSTAT302N, Metrohm) in four techniques of potentiometry, chronoamperometry (CA), cyclic voltammetry (CV), and square wave voltammetry (SWV).



Table S9. Comparison of UWED and a commercial benchtop potentiostat and a commercial benchtop potentiometer. Properties of commercial instruments are according to the manufacturer datasheets. The EMF16 is designed for potentiometric measurements and can only measure electrical potential. We listed the price paid by our laboratory as the cost of the instruments; the current cost may vary.

| Parameter                                        | UWED                                                                                            | AutoLAB                                  | EMF16                                   |
|--------------------------------------------------|-------------------------------------------------------------------------------------------------|------------------------------------------|-----------------------------------------|
| Range of potential that the instrument can apply | $\pm 1.5$ V                                                                                     | $\pm 10$ V                               | NA                                      |
| Accuracy in the applied potential                | $\pm 1$ mV (non-linearity)                                                                      | $0.2\% \pm 2$ mV                         | NA                                      |
| Resolution of applied potential                  | $67$ $\mu$ V                                                                                    | $120$ $\mu$ V                            | NA                                      |
| Resolution in the measured potential             | $50$ $\mu$ V                                                                                    | $0.3$ $\mu$ V                            | $0.6$ $\mu$ V                           |
| Current range                                    | $\pm 180$ $\mu$ A                                                                               | $\pm 2$ A                                | NA                                      |
| Number of current ranges                         | 1                                                                                               | 9 (between $10$ nA to $1$ A)             | NA                                      |
| Accuracy in measuring current                    | $0.4\%$ of range ( $1.5$ $\mu$ A non-linearity, $100$ nA full-range noise, $6.3$ nA resolution) | $0.2\%$ of range                         | NA                                      |
| Number of channels                               | 1                                                                                               | 1                                        | 16                                      |
| Input impedance                                  | $\sim 1$ G $\Omega$                                                                             | $>1$ T $\Omega$                          | $10$ T $\Omega$                         |
| Power consumption                                | $20$ mW                                                                                         | $300$ W                                  | $< 5$ W                                 |
| Weight                                           | $56$ g (of which $10$ g is electronics)                                                         | $\sim 18$ kg                             | $\sim 3$ kg                             |
| Dimensions                                       | $8 \times 4 \times 2.3$ cm <sup>3</sup>                                                         | $52 \times 42 \times 16$ cm <sup>3</sup> | $22 \times 20 \times 6$ cm <sup>3</sup> |
| Cost                                             | $60$ USD                                                                                        | $25,000$ USD                             | $1,995$ USD                             |

## 7.1 Potentiometry

### 7.1.1 Experimental Description

*Measurements:* We tested the potentiometric mode of UWED using in-house built  $K^+$  and  $Na^+$  ion-selective electrodes (ISEs). We used a double-junction free-flow Ag/AgCl reference electrode (Metler Toledo DX200) with an inner-filling solution of 3 M KCl and bridge electrolyte of 1 M lithium acetate. We measured the electrical potential of the ISEs in series of NaCl and KCl solutions with concentrations ranging over 6 orders of magnitude (100 mM–100 nM). We compared the potential measured with UWED and with a commercial precision electrochemical EMF interface (EMF 16 Lawson Labs Inc). We placed the ISEs in the  $K^+$  or  $Na^+$  solutions for 60s, and collected the data over the last 30s. The sampling rate of UWED was 20 Hz and the sampling rate of commercial potentiometer was 1 Hz.

*Materials:* All reagents were used without any further purification. Potassium ionophore I (valinomycin), potassium tetrakis(4-chlorophenyl)borate (KTPClB, Selectophore grade), 2-nitrophenyl octyl ether (*o*-NPOE), high molecular weight poly(vinyl chloride) (PVC), sodium tetrakis[3,5-bis(trifluoromethyl)phenyl]borate (NaTFPB, Selectophore grade), N,N,N',N'-tetracyclohexyl-1,2-phenylenedioxydiacetamide (sodium ionophore III, Selectophore grade) and tetrahydrofuran (THF, inhibitor-free, for HPLC, purity  $\geq 99.9\%$ ) were all purchased from Sigma-Aldrich.

*Fabrication of ion-selective electrodes:* We fabricated the ion-selective electrodes according to protocols established in the literature.<sup>5,6</sup> We first prepared the ion-selective membrane (ISM). We dissolved the membrane components into 7 mL of THF, stirred the solution for two hours to obtain a homogenous mixture, and poured this mixture into a Petri dish (5 cm diameter), and allowed the THF to evaporate overnight to form the ISM. The potassium sensing membrane

cocktail consisted of *o*-NPOE (65.85 wt. %), PVC (32.95 wt. %), valinomycin (1.00 wt. %), and KTpCIB (0.20 wt. %) with a 2:1 molar ratio of ionophore to KTpCIB. The sodium sensing membrane consisted of *o*-NPOE (65.71 wt. %), PVC (32.85 wt. %), sodium ionophores III (1.00 wt. %), and NaTFPB (0.44 wt. %) with a 2:1 molar ratio of ionophore to NaTFPB.

We cut the ISM (approximate thickness of ISM 200  $\mu\text{m}$ ) into small circular pieces ( $\approx 1$  cm in diameter), wetted one end of the PVC electrode body (Tygon tubing,  $\approx 0.9$  cm diameter) with 50  $\mu\text{L}$  of THF, and pressed the ISM on the wetted area of the tube to seal the end of the tube with the ISM. We filled the tube with 10 mM KCl for the  $\text{K}^+$  ISEs and with 10 mM NaCl for the  $\text{Na}^+$  ISE, inserted an AgCl-coated Ag wire in the tube, and sealed the end of the tube with Parafilm. We stored the electrodes in solutions identical to their inner-filling solutions.

### 7.1.2 Results

Figures S10 and S11 show electrical potential of  $\text{K}^+$  and  $\text{Na}^+$  ISEs, measured with UWED and commercial potentiometer. Figure S12 summarizes the differences in noise and drift between the electrical potential measured by UWED and the commercial potentiostat. The higher noise level in measurement done with UWED (100-200 $\mu\text{V}$ ) is partly due to shorter integration time (20 Hz vs 1 Hz) in UWED compared to the commercial device (10-40 $\mu\text{V}$ ). Averaging the potential over 20 samples would reduce the noise level of UWED, giving a noise of 20–47  $\mu\text{V}$ , which is comparable with that of the commercial device. Digital resolution for the UWED and a commercial device is 50.3  $\mu\text{V}$  and 0.6  $\mu\text{V}$ , respectively, while full-scale non-linearity of commercial device according to specification is 200  $\mu\text{V}$  (0.002% of 10V). We also observed slightly higher drift in potential of ISEs in case of commercial device. This observation could be due to the measurement sequence (we measured first with the commercial device, followed by

the UWED), and stabilization of potential of ISEs overtime. Total measurement deviations between the UWED and commercial potentiostat was  $<1.5$  mV. Figure S13 shows the final calibration curve of the  $\text{Na}^+$  ISE where the potential of the ISE is plotted with respect to log concentration of  $\text{Na}^+$ ; We see similar results from the UWED and the commercial potentiometer.

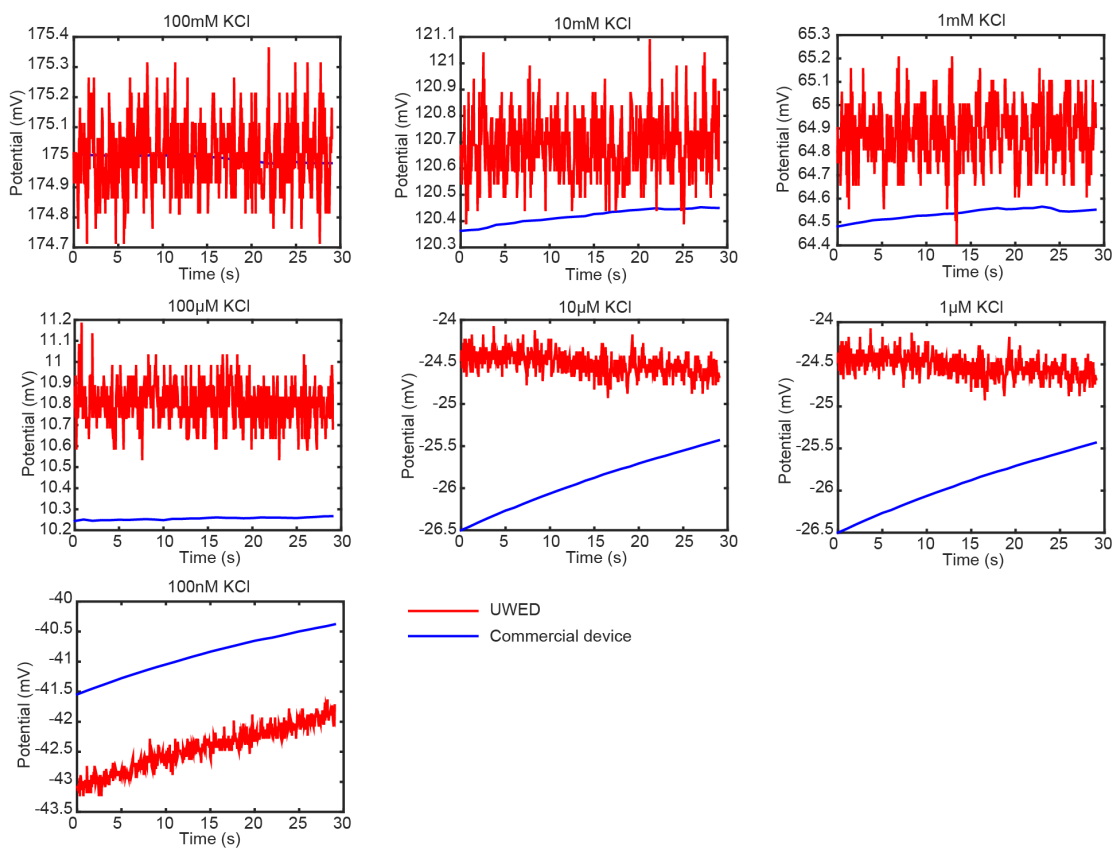

Figure S10. Drifts in electrical potential of  $\text{K}^+$  ISE measured with UWED and a commercial potentiometer.

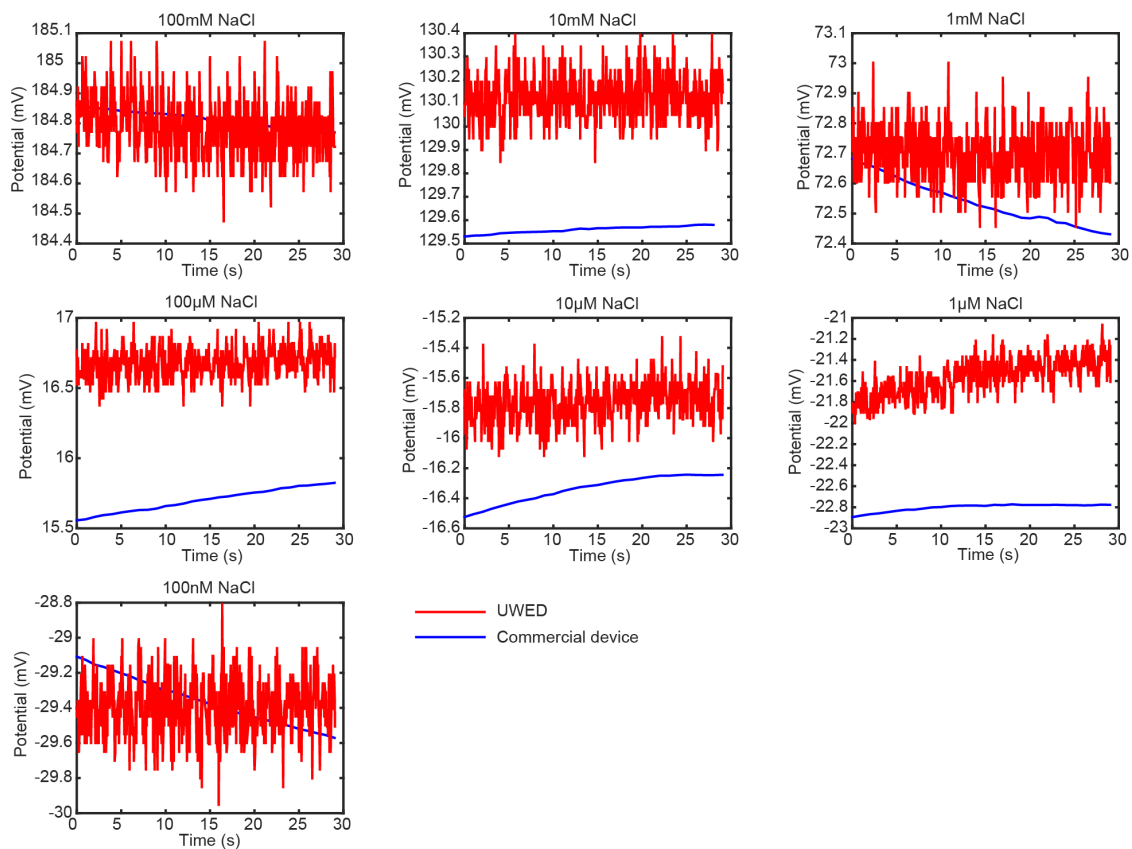

Figure S11. Drifts in electrical potential of Na<sup>+</sup> ISE measured with UWED and a commercial potentiometer.

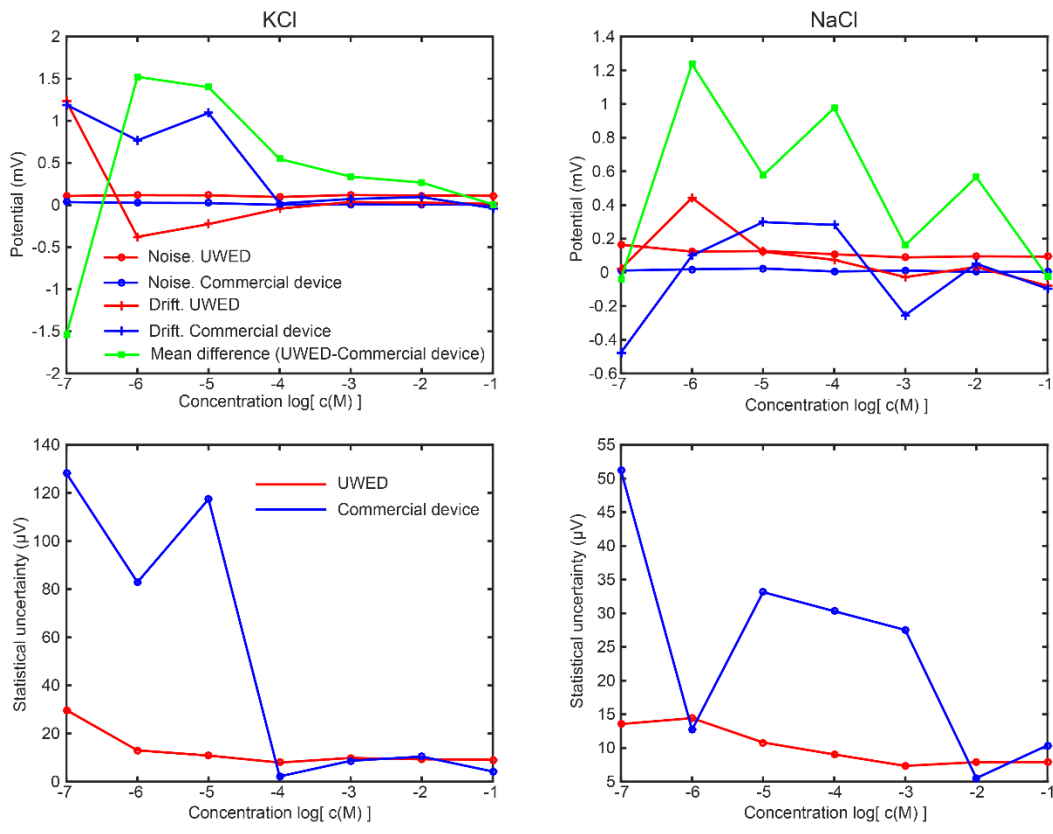

Figure S12. Comparison of noise and drift in potential of ISEs measured with UWED and the commercial potentiometer. We calculated statistical uncertainty as  $std(Signal)/\sqrt{N_{datapoints}}$ .

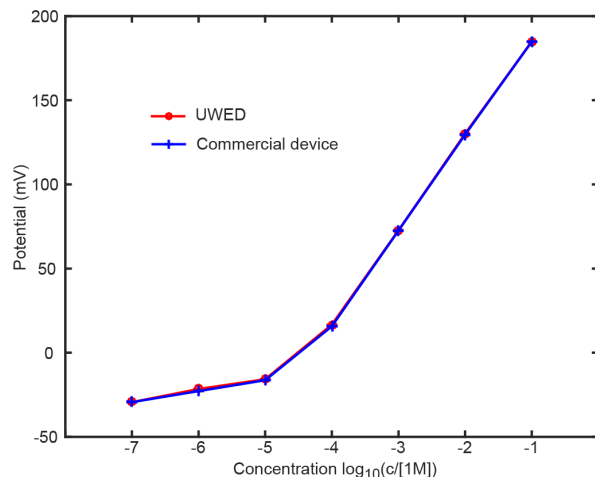

Figure S13. Potential of  $\text{Na}^+$ -ISE in  $\text{Na}^+$  solutions with varying concentrations, measured with UWED and a commercial potentiostat. The slope of potential of ISE vs log concentration of  $\text{Na}^+$  agreed with the theoretically expected Nernstian slope of 59.2 mV/decade. We observed a slope of 56.2 mV/decade for UWED and 56.4 mV/decade for the commercial potentiostat over a concentration range of 100–0.1 mM  $\text{Na}^+$ .

## 7.2 Chronoamperometry (CA)

### 7.2.1 Experimental Description

*Measurements:* We used a commercial screen-printed three-electrode cell (DRP-110CNT-GNP, DropSens, Llanera, Spain) for performing the chronoamperometry on ferricyanide. This electrode contained a carbon (modified with gold) working electrode, carbon counter electrode, and silver reference electrode. We placed 40  $\mu\text{L}$  of fresh solution of ferricyanide on the working zone of the screen-printed electrode, applied a potential of 100 mV to the working electrode (vs the reference electrode), and recorded the current (from 0.5 s to 5 s) with the UWED and a benchtop commercial potentiostat (AutoLAB).

*Preparation of solutions:* We prepared solutions of ferricyanide (10 mM to 10  $\mu\text{M}$ ) in a PBS buffer (Lonza, Walkersville, MD, 1 mM  $\text{KH}_2\text{PO}_4$ , 56 mM  $\text{Na}_2\text{HPO}_4$ , 150 mM  $\text{NaCl}$ , pH 7.4).

## 7.2.2 Results

Figure S14 shows the chronoamperograms of ferricyanide at concentrations ranging from 10 mM to 25  $\mu\text{M}$ . There is excellent agreement between data obtained by the uWED and the commercial potentiostat at concentrations of 2.5  $\mu\text{M}$ –2.5 mM ferricyanide. At concentrations of 5–10 mM the current exceeds the current range of UWED (maximum 180  $\mu\text{A}$ ), and causes deviation between measurements of UWED and the commercial potentiostat. Figure S15 shows the theoretically expected linear relationship between the current (sampled at 1 s) and concentration of ferricyanide. There is good agreement between data obtained by UWED and the commercial potentiostat within the concentration range of 25  $\mu\text{M}$ –2.5 mM, which the current is within the current range of UWED.

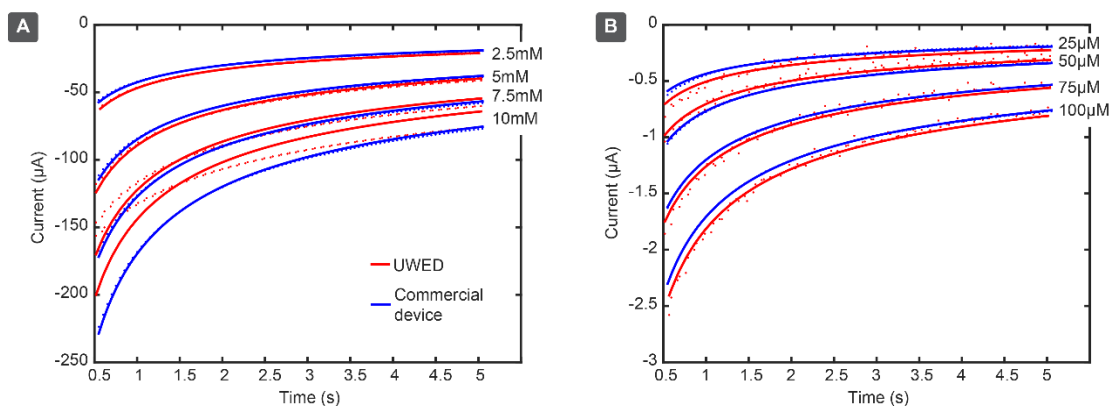

Figure S14. Chronoamperograms of ferricyanide with concentrations of 2.5–10 mM (panel A) and 25–100  $\mu\text{M}$  (panel B). Potential of working electrode was 100 mV (vs Ag pseudoreference). Dots represent the measured data points (current values) and the continuous line shows the fit to the Cottrell equation.



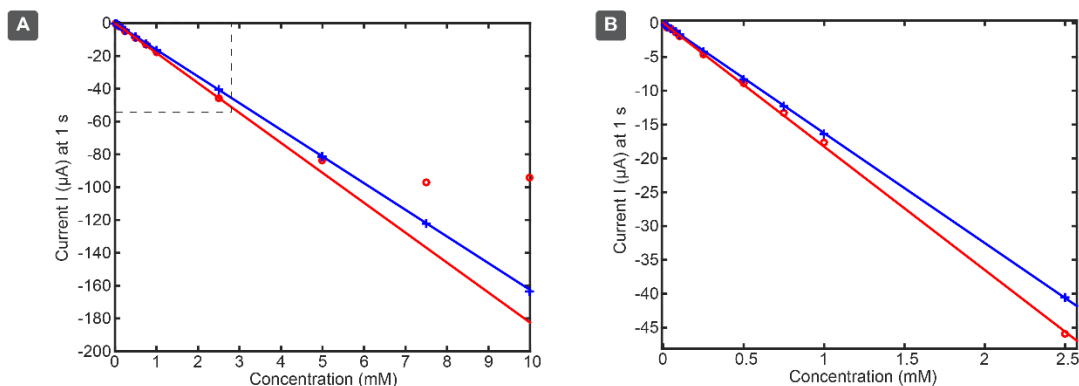

Figure S15. Linear correlation between the chronoamperometric current and the concentration of ferricyanide. (A) shows the concentration range of 0–10 mM and (B) shows the zoomed in range of 0–2.5 mM. The current measured by UWED deviates from linearity in concentrations of larger than 2.5 mM, because the current exceeds the maximum of current range of UWED.

### 7.3 Cyclic Voltammetry (CV)

We measured CVs using a commercial screen-printed three-electrode cell (as described in Section 7.2.1) in solutions of ferricyanide (solution preparation in Section 7.2.1), with UWED and a benchtop commercial potentiostat (AutoLAB). Figures S16 and S17 show good agreement between CVs (of ferricyanide with varying concentrations and at different scan rates) measured with UWED and the commercial potentiostat.

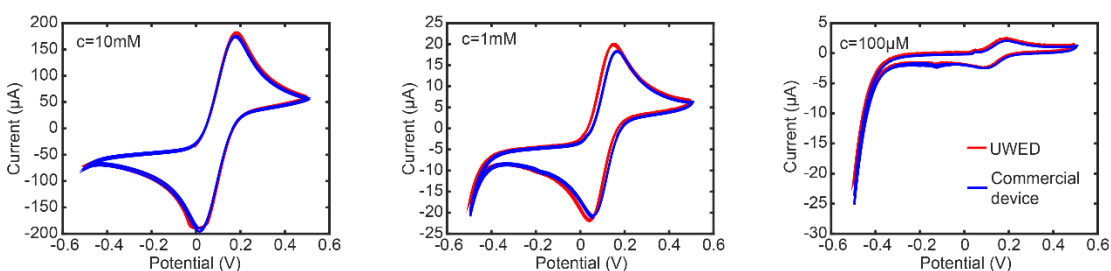

Figure S16. Cyclic voltammograms of 10 mM, 1 mM, and 0.1 mM ferricyanide (scan rate at 100 mV/s).

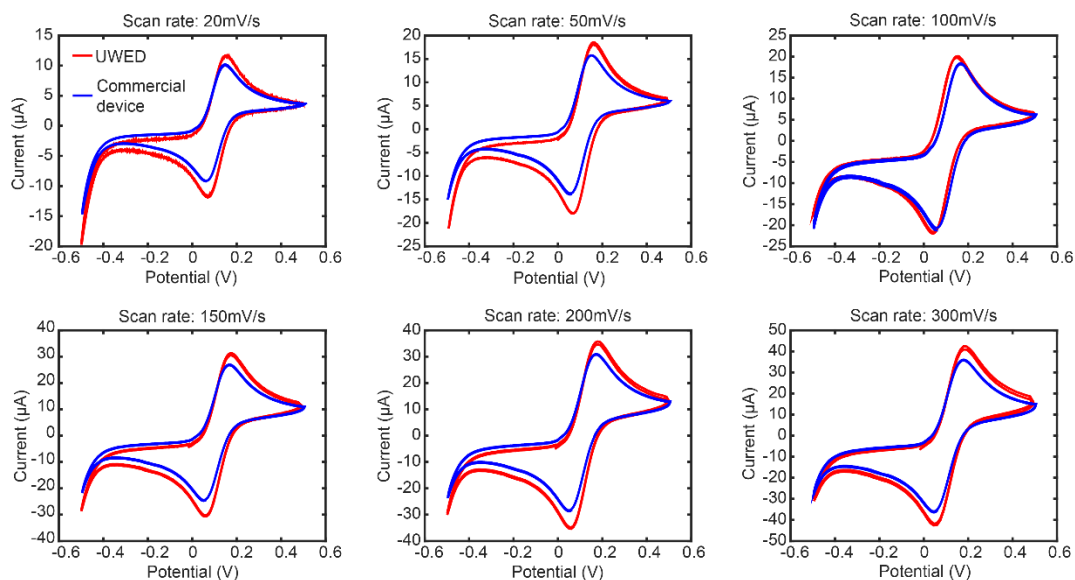

Figure S17. Cyclic voltammograms of 1 mM ferricyanide at a scan rate of 20, 50, 100, 150, 200, and 300 mV/s.

## 7.4 Square Wave Voltammetry (SWV)

We measured square wave voltammograms using a commercial, screen-printed, three-electrode cell (as described in Section 7.2.1) in solutions of ferricyanide (solution preparation described in Section 7.2.1), with UWED and a benchtop commercial potentiostat (AutoLAB). Figure S18 shows that at concentrations of 5 mM or less ferricyanide the peaks measured by uWED and the commercial potentiostat are in good agreement. At high concentrations (7.5 and 10 mM) the current exceeds the maximum of current range of UWED, and causes the double-peak looking artifact. Figure S19 shows that the theoretically-expected linear relationship between the peak height of the square wave voltammograms and the concentration of ferricyanide.

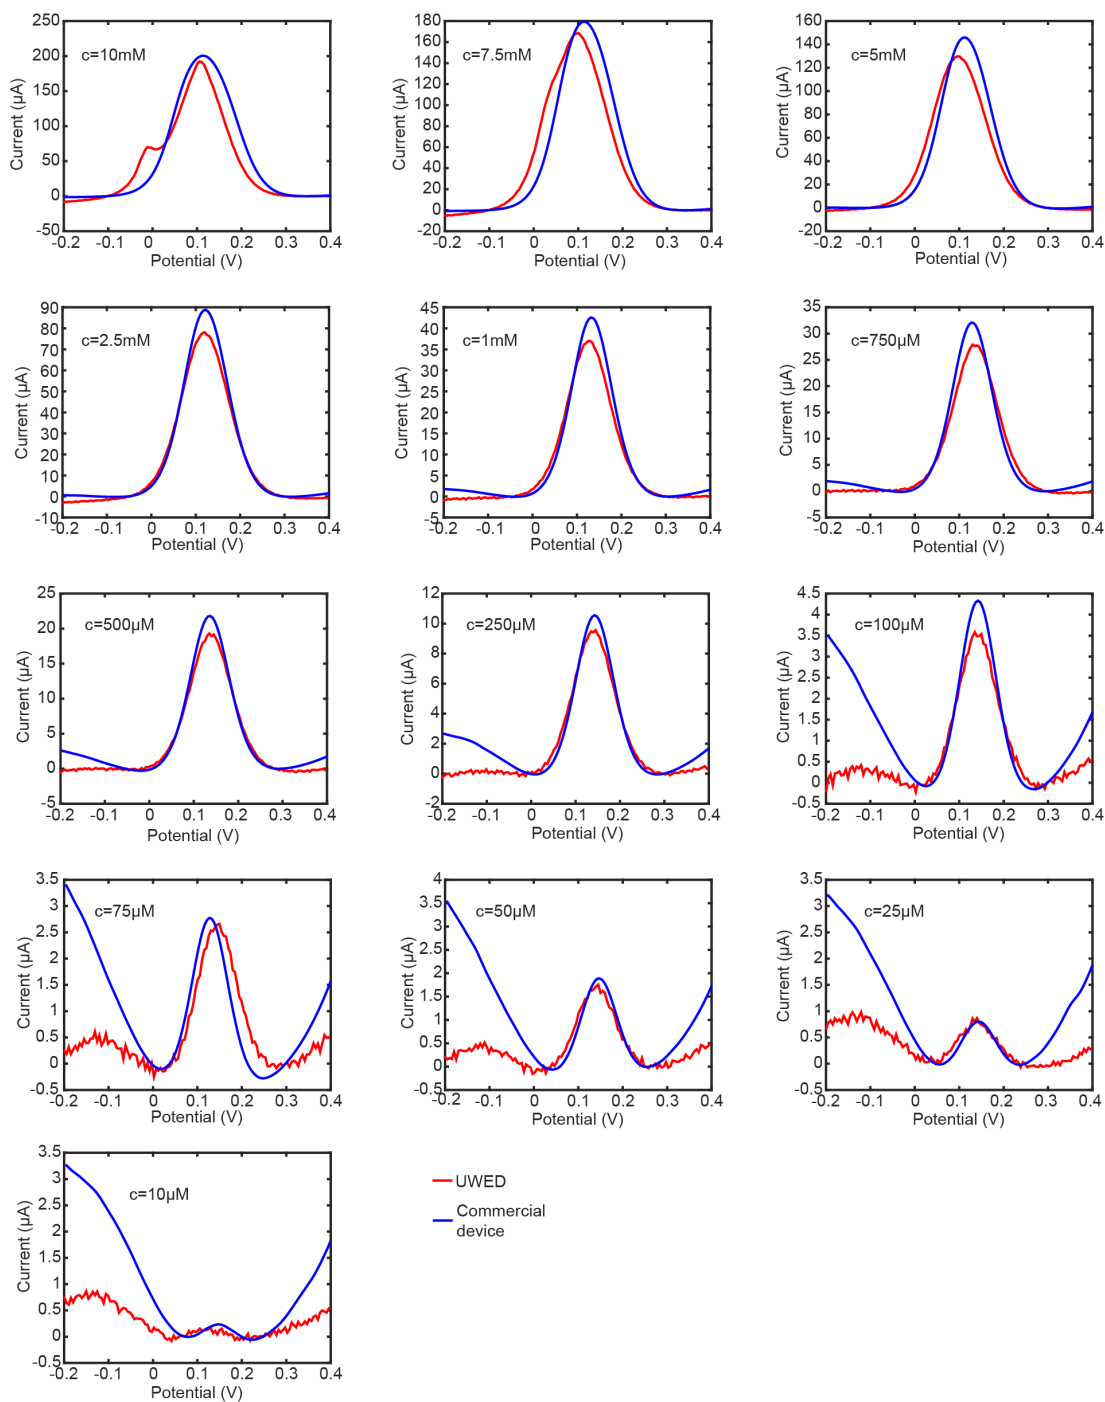

Figure S18. Square wave voltammograms of ferricyanide at concentrations ranging from 10  $\mu\text{M}$ –10 mM. We scanned the potential from 0.4 to -0.2 V at a scan rate 50 mV/s (5 mV steps), with amplitude of 25 mV and frequency of 10 Hz.

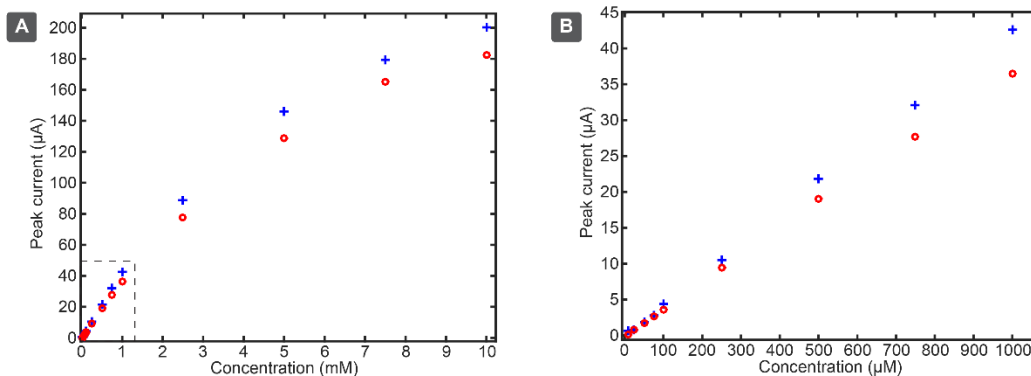

Figure S19. Linear correlation of peak height of the SWV with the concentration of ferricyanide.

(A) shows the full range of 0–10 mM, and (B) shows a zoomed-in range of 0–1 mM.

## 8. Additional Resources

Separate .zip file contains following folders and files

- Electronics – folder is containing the electronic design (Eagle 7.6.0 free version)
  - UWED.sch – Eagle circuit diagram
  - UWED.brd – Eagle PCB board design (for manufacturing)
  - GerberFiles/ – Folder containing board design in Gerber format (used for manufacturing). This folder contains files: UWED.cmp, UWED.dpv, UWED.sol, UWED.stc, UWED.sts and Gerber files explanation.pdf describing exactly each Gerber file.
- Firmware – folder is containing the Arduino firmware
  - Firmware.ino - Firmware for onboard microcontroller RFDUINO
- Apps – folder is containing source codes of basic electrochemical test applications for iOS (in TechBASIC)
  - POT.BAS - Potentiometry
  - CA.BAS - Chronoamperometry
  - CV.BAS – Cyclic voltammetry
  - SWV.BAS – Square wave voltammetry
  - DPV.BAS – Differential pulse voltammetry
  - GUI.BAS - Graphical user interface with inputs for CV and SWV

- Code\_as\_pdf – folder is containing all the software code (firmware and apps) as pdf files.

Video (UWED.mov) is showing an example of device operation (CV).

## References

- (1) Nemiroski, A.; Christodouleas, D. C.; Hennek, J. W.; Kumar, A. A.; Maxwell, E. J.; Fernández-Abedul, M. T.; Whitesides, G. M. *Proc. Natl. Acad. Sci. U.S.A.* **2014**, *111*, 11984-11989.
- (2) Rowe, A. A.; Bonham, A. J.; White, R. J.; Zimmer, M. P.; Yadgar, R. J.; Hobza, T. M.; Honea, J. W.; Ben-Yaacov, I.; Plaxco, K. W. *PLOS ONE* **2011**, *6*, e23783.
- (3) Dryden, M. D. M.; Wheeler, A. R. *PLOS ONE* **2015**, *10*, e0140349.
- (4) Dobbelaere, T.; Vereecken, P. M.; Detavernier, C. *HardwareX* **2017**, *2*, 34-49.
- (5) Buhlmann, P.; Pretsch, E.; Bakker, E. *Chem. Rev.* **1998**, *98*, 1593-1687.
- (6) Buhlmann, P.; Chen, L. D. In *Supramolecular Chemistry: From Molecules to Nanomaterials*, Steed, J. W.; Gale, P. A., Eds.; John Wiley & Sons Ltd: Chichester, UK, 2012.
